1 **Mobilizing faith-based COVID-19 health ambassadors to**  
2 **address COVID-19 health disparities among African**  
3 **American older adults in under-resourced communities: A**  
4 **hybrid, community-based participatory intervention**

5  
6 **Short Title: Improving COVID-19 health equity for African**  
7 **American older adults through faith-based health ambassadors.**  
8

9 Edward K. Adinkrah<sup>1\*</sup>, Shahrzad Bazargan<sup>2,3</sup>, Sharon Cobb<sup>4</sup>, Lucy W. Kibe<sup>5</sup>, Roberto Vargas<sup>6</sup>,  
10 Joe Waller<sup>7</sup>, Humberto Sanchez<sup>7</sup>, Mohsen Bazargan<sup>1,8</sup>

- 11  
12 1. Department of Family Medicine, Charles R. Drew University of Medicine and Science,  
13 Los Angeles, CA, USA  
14  
15 2. Departments of Psychiatry, Charles R. Drew University of Medicine and Science, Los  
16 Angeles, CA, USA  
17  
18 3. Department of Psychiatry and Biobehavioral Sciences, University of California Los  
19 Angeles, CA, USA  
20  
21 4. Mervyn M. Dymally College of Nursing, Charles R. Drew University of Medicine and  
22 Science, Los Angeles, CA, USA  
23  
24 5. Physician Associate Program, Charles R. Drew University of Medicine and Science, Los  
25 Angeles, CA, USA  
26  
27 6. Department of Internal Medicine, Charles R. Drew University of Medicine and Science,  
28 Los Angeles, CA, USA  
29  
30 7. Office of Research, Charles R. Drew University of Medicine and Science, Los Angeles,  
31 CA, USA  
32  
33 8. Department of Family Medicine, University of California Los Angeles, Los Angeles, CA,  
34 USA

35  
36 \*Corresponding author  
37 Email: [edwardadinkrah1@cdrewu.edu](mailto:edwardadinkrah1@cdrewu.edu) (E.K.A)

## 38 **Abstract**

39 The COVID-19 pandemic disproportionately affected older adults, particularly those with pre-  
40 existing chronic health conditions. To address the health disparity gap and challenges faced by  
41 under-resourced African American older adults in South Los Angeles during this period, we  
42 implemented a hybrid (virtual/in-person), pre-post, community-based participatory intervention  
43 research project utilizing a faith-based lay health advisor model (COVID-19 Health Ambassador  
44 Program (CHAP)). We recruited COVID-19 Health Ambassadors (CHAs) and African American  
45 older adults (participants) from faith-based organizations who partook in CHA-led meetings and  
46 follow-ups that educated and supported the participants. This paper seeks to evaluate this  
47 intervention's implementation using the Consolidated Framework for Implementation Research  
48 (CFIR) as a reporting tool with an emphasis on fidelity, challenges, and adaptations based on  
49 data collected via stakeholder interviews and surveys. Results: CHAP was delivered to 152  
50 participants by 19 CHAs from 17 faith-based organizations. CHAs assisted with chronic disease  
51 management, resolved medication-related challenges, encouraged COVID-19 vaccination,  
52 reduced psychological stress and addressed healthcare avoidance behaviors such as COVID-19  
53 vaccine hesitancy among the participants. Challenges encountered include ensuring participant  
54 engagement and retention in the virtual format and addressing technological barriers for CHAs  
55 and participants. Adaptations made to better suit the needs of participants included providing  
56 communication tools and additional training to CHAs to improve their proficiency in using  
57 virtual platforms in addition to adapting scientific/educational materials to suit our participants'  
58 diverse cultural and linguistic needs. Conclusion: The community-centered hybrid approach in  
59 addition to our partnership with faith-based organizations and their respective COVID-19 health  
60 ambassadors proved to be essential in assisting underserved African American older adults  
61 manage chronic health conditions and address community-wide health disparities during the

- 62 COVID-19 pandemic. Adaptability, cultural sensitivity, and teamwork are key to implementing
- 63 health interventions especially in underserved populations.

## 64 **Introduction**

65 The COVID-19 pandemic posed significant challenges in managing chronic health conditions,  
66 particularly among underserved African American (AA) older adults with underlying health  
67 issues (1-3). This under-resourced population, who have historically relied on county-based  
68 safety-net facilities for their healthcare needs(4), were forced to adjust their health-seeking  
69 behaviors and patterns of necessary medical care to manage their chronic health conditions.  
70 Consequently, this may have resulted in delayed, reduced, or halted visits to primary and  
71 specialty healthcare providers or pharmacies for medication (3). Moreover, pre-existing health  
72 disparities and conditions may have been exacerbated due to limited access with healthcare  
73 providers/resources and medication availability and adoption of risky health behaviors, including  
74 non-adherence to chronic health condition management guidelines, unhealthy lifestyles, and  
75 dietary practices (5). In response to these challenges and the urgent need for timely and health  
76 information during the pandemic(6), innovative approaches were necessitated to address health  
77 disparities and promote effective self-management of chronic health conditions.

78 This particular approach capitalizes on the external influence of trusted community  
79 organizations and leaders, such as faith-based organizations (FBOs) who have been historically  
80 recognized as vital sources of social support and resources for AA communities (7). More  
81 importantly, the engagement of Lay Health Advisors (LHAs) (8) from these FBOs are  
82 recognized as community liaisons trained to provide health-related support, guidance, and  
83 education to their peers (9). By sharing cultural, linguistic, and socioeconomic backgrounds with  
84 the populations they serve, LHAs foster trust, rapport, and understanding (10). The integration of  
85 LHAs from community churches into health interventions has demonstrated effectiveness in  
86 improving health outcomes and addressing the unique needs of AA older adults with chronic  
87 health conditions (11-13).

88 To adapt to the unique challenges of the COVID-19 pandemic, including the necessity for  
89 social distancing and reduced face-to-face interactions, a community-based participatory  
90 intervention utilizing a hybrid LHA model, the COVID-19 Health Ambassador Program  
91 (CHAP), was implemented. This model combined the benefits of in-person and virtual/telephone  
92 interactions, leveraging internet-enabled devices/phones and the growing digital literacy among  
93 older adults to facilitate remote support and engagement while maintaining the essential personal  
94 connection (14, 15). This paper aims to evaluate the successful implementation of CHAP in  
95 addressing health disparities among underserved AA older adults during the COVID-19  
96 pandemic using the Consolidated Framework for Implementation Research (CFIR) as a reporting  
97 tool.

## 98 **Methods and materials**

99 This study utilized a mixed-methods, community-based participatory research (CBPR) approach  
100 to implement a “one group, pretest–posttest” intervention over a two-year period. All participants  
101 provided written, informed consent before participating, and the study protocol was approved by  
102 the ethical committee of the Charles R. Drew University of Medicine and Science Institutional  
103 Review Board (IRB). Authors had no access to information that could identify individual  
104 participants during or after data collection.

## 105 **Setting**

106 This study took place in 17 predominantly African American FBOs primarily located in urban  
107 regions of Los Angeles County Service Planning Area (SPA) 6, which experienced a significant  
108 impact from the COVID-19 pandemic. Compared to the rest of Los Angeles County, SPA 6  
109 individuals face increased health challenges at a disproportionate rate.(16) The FBOs, situated  
110 within a 10-mile radius of the primary study site, had a well-established membership of older

111 adults who frequently participated in religious services and maintained ongoing relationships  
112 with their respective leadership (e.g. pastors, ministers, deacons, etc.).

## 113 **Recruitment**

114 The study's lead community faculty (CF), who is also serves as the head pastor of a participating  
115 FBOs, initiated contact with other head pastors (HP) and prominent faith-based leaders (FL) to  
116 encourage their participation in the research project. Interested FBOs with their respective  
117 leaders were conveniently sampled and recruited into the study between 2020 and 2022. No FBO  
118 was excluded based on denomination or size of the congregation.

119 Potential CHAs were conveniently sampled from our 17 partner FBOs. Based on  
120 recommendations from individual faith-based leaders, trusted parishioners who voluntarily  
121 signed up to become CHAs were chosen based on the following criteria: 1) 18 years and older, 2)  
122 AA parishioner from a registered partner FBO, 3) attend a 3-day workshop training, 4) provide at  
123 least 3 hours per week for study activities, 5) strongly committed to assisting older adults with  
124 chronic illness management and COVID-19 risk reduction, 6) familiar with AA community, and  
125 7) able to communicate effectively in both English and the preferred language of the older adults.

126 Also, the FBOs provided access to potential participants of the study. These would be  
127 members who were 65 years and older or 55 years and older with at least one chronic health  
128 condition. Residents in care facilities and those with cognitive deficits (identified by the short  
129 version of the mini-mental state examination instrument) were excluded from the intervention.

## 130 **Data collection**

131 Data on participant and CHA sociodemographic characteristics, chronic health conditions, and  
132 health status were gathered through surveys. Participants completed the study surveys using  
133 different methods, including Uniform Resource Locator (URL), telephone interview, or CHA-

134 administered interview. Additionally, participants' acceptance and completion rates throughout  
135 the intervention were assessed. Complementing the survey-based approach, in-depth interviews  
136 were employed to gain a deeper understanding of the FBO leaders' and CHAs' viewpoints  
137 regarding the project and its implementation process. As part of the data-gathering process,  
138 CHAs and older adult participants identified and prioritized significant barriers and facilitators to  
139 implementing the intervention within their church or community setting.

## 140 **Analysis plan**

141 Data analysis was conducted using descriptive statistics for the quantitative data and thematic  
142 analysis for the qualitative data. CFIR, a useful tool for assessing potential barriers and  
143 facilitators in implementing healthcare interventions, was utilized to guide the analysis of the  
144 implementation process and identify areas for improvement. This tool provides a practical,  
145 theory-based guide to tailor implementation strategies and adaptations based on these factors and  
146 explain the outcomes of the implementation process(17). The project team also documented any  
147 adaptations made to the intervention based on feedback from the CHAs and older adults. The  
148 participants' identified facilitators and barriers were grouped and reviewed before being  
149 compiled. The quantitative data were analyzed using SPSS (version 25). To produce a narrative  
150 report based on the CFIR domains, qualitative data were organized according to the CFIR  
151 constructs and sub-constructs.

## 152 **Implementation strategies**

153 Our project employed innovative implementation strategies by leveraging the trust and expertise  
154 of all stakeholders. These formed the basis of the project's conceptual model and broadly  
155 described below.

## 156 **Community strategizing**

157 A six-step strategy was developed to forge strong relationships with the FBO leadership and  
158 adapt COVID-19 public health guidelines for their respective denominations. This approach  
159 involved recruiting leaders, creating a specialized curriculum, and conducting a 3-day virtual  
160 training workshop to empower them in addressing COVID-19-related concerns within their  
161 communities. FBO leaders were responsible for implementing infection prevention measures,  
162 carrying out routine environmental assessments, and ensuring protocol compliance. Additionally,  
163 they participated in community outreach through the university's weekly public radio show that  
164 promoted the CHAP's goals and discussed culturally sensitive topics during the pandemic. These  
165 included, 1) 'Managing COVID-19 Grief in Our Community', 2) 'Mental Health and Social  
166 Isolation among African Americans', 3) 'How to Mitigate Vaccine Barriers in our  
167 Communities', 4) 'How 'Your Health Is Connected to Your Faith'', and 5) 'Addressing Vaccine  
168 Hesitancy among the Youth; The Role of the Church'. FBOs supported the project by recruiting  
169 lay health advisors, coordinating communication between advisors and participants, and  
170 facilitating participant involvement.

## 171 **Community building and sustainability**

172 The individual-level collaborations established with FBO leadership enabled the development of  
173 a tailored CHA curriculum and the dissemination of the CHA workshop/training program. The  
174 courses within the workshop covered CHA roles, COVID-19 knowledge, testing and vaccination  
175 concerns, risk prevention strategies, social determinants, chronic disease management, available  
176 community resources, and specialized care delivery (Table 1). The 3-day virtual workshop was  
177 facilitated by FBOs, research/academic staff, healthcare providers, and community faculty, with  
178 recorded sessions available to those who missed the live event and for CHAs who needed  
179 refresher training. CHAs received iPads and were trained in confidentiality and data security.



Table 1. List of Topics and Presenters as Used in Training Guideline for CHAs

| <b>Topics Covered</b>                                            | <b>Presenter</b>                             |
|------------------------------------------------------------------|----------------------------------------------|
| Functions and expectations of lay health advisors                | Research Staff/Church Leader                 |
| Medical & Research Mistrust                                      | Public Health Specialist                     |
| COVID-19 testing and vaccination in community settings           | Physician 1                                  |
| COVID-19 vaccine equity                                          | Physician 2                                  |
| Mental health and COVID-19 related trauma                        | Mental Health Nurse                          |
| Chronic disease management (with and without COVID-19 diagnosis) | Physician                                    |
| Telehealth and online services                                   | Physician 3                                  |
| How to be a church-based health advisor                          | Public Health Specialist<br>/Church Leader 1 |
| Motivational interviewing in the church                          | Church Leader 2                              |
| How to communicate with parishioners on their medications        | Pharmacist 1                                 |
| Alternative treatments to COVID-19                               | Pharmacist 1                                 |
| Linking community resources to community needs                   | Community Faculty                            |
| Health tracking and data collection                              | Research Staff                               |
| Immunization                                                     | Public Health Nurse                          |

180

181 **Individualized management of care**

182 The project team collaborated to create culturally appropriate intervention materials and trained  
 183 CHAs to support participants via phone calls and videoconferencing remotely. The three-month  
 184 intervention included five broad activities: 1) completion of pre- and post-intervention surveys,

185 2) attendance at six bi-weekly online/hybrid meetings, 3) participation in individualized  
186 checkups/visits, 4) project support and feedback, and 5) participation in a post-study  
187 conference/gala. The team coordinated with FBOs to align schedules and ensure CHA  
188 availability. CHAs helped older adults develop personalized action plans for managing chronic  
189 health conditions, addressing medication management, healthy eating, and physical activities.  
190 **Fig 1. Conceptual model of a hybrid community-partnered intervention project using faith based**  
191 **lay health advisors.**

## 192 **Results**

193 The intervention engaged 17 AA FBOs in South Los Angeles, with additional churches in  
194 Southern California’s Inland Empire, Antelope Valley, and Victorville (n=3). On a daily average,  
195 47 CHAs from these FBOs attended the 3-day workshop, and 19 CHAs actively participated in  
196 the recruitment and support of participants. Each CHA aimed to recruit 10 participants, resulting  
197 in a 22% rejection rate, as 2 out of 10 parishioners averagely declined the 19 CHAs’ invitations  
198 to participate in the study’s baseline data collection. Consequently, out of the 152 participants  
199 who enrolled in the study, 110 participants completed the intervention, yielding a 72%  
200 completion rate.

Table 2. Recruitment and Completion Rates of CHAs and Participants

|                                                                  | Cohort One | Cohort Two | Total |
|------------------------------------------------------------------|------------|------------|-------|
| <b>Faith-Based Organizations</b>                                 |            |            |       |
| Participating Churches                                           | 8          | 9          | 17    |
| <b>Faith-Based COVID-19 Ambassadors</b>                          |            |            |       |
| Prospective Number of COVID-19 Ambassadors<br>(three per church) | 24         | 27         | 51    |

|                                                                                                                  |      |     |     |
|------------------------------------------------------------------------------------------------------------------|------|-----|-----|
| Trained COVID-19 Ambassadors                                                                                     | 24   | 23  | 47  |
| Active COVID-19 Ambassadors during Intervention                                                                  | 14   | 5   | 19  |
| Participation rate of Trained COVID-19 Ambassadors<br>(trained/expected number)                                  | 100% | 85% | 92% |
| Participation rate of Active COVID-19 Ambassadors<br>(active/trained)                                            | 58%  | 22% | 40% |
| <b>African American Older Adult Parishioners<br/>(Participants targeted for CHAP)</b>                            |      |     |     |
| Number of prospective participants (10 participants<br>from each active ambassador)                              | 140  | 50  | 190 |
| Number of recruited participants pre-CHAP<br>(completed baseline survey)                                         | 118  | 34  | 152 |
| Number of participants who completed CHAP                                                                        | 90   | 20  | 110 |
| Percentage of participant completed CHAP<br>(participants recruited pre-CHAP/participants who<br>completed CHAP) | 76%  | 67% | 72% |

201  
 202           The majority of participants (70%) were female, with a mean age of 69 (SD: 9), and 25%  
 203 were aged  $\geq 75$  years. Approximately 14% did not complete high school, 33% lived alone, and  
 204 98% had health insurance. Over 35% reported poor or fair physical health, and participants had  
 205 an average of two chronic health conditions. The most prevalent comorbidities were  
 206 hypertension (59%), COPD or asthma (24%), diabetes mellitus (22%), and heart disease (11%).

Table 3. Sociodemographic characteristics of Participants and CHAs

| Sociodemographic Characteristics | Participants Targeted for CHAP (Older African American Parishioners),<br>N=152,<br>N (%) | CHAs, N=19,<br>N (%) |
|----------------------------------|------------------------------------------------------------------------------------------|----------------------|
| <b>Gender</b>                    |                                                                                          |                      |
| Male                             | 45 (30)                                                                                  | 3 (16)               |
| Female                           | 105 (70)                                                                                 | 16 (84)              |
| <b>Age</b>                       |                                                                                          |                      |
| 40-54                            | 0 (0)                                                                                    | 1(5)                 |
| 55-64                            | 48 (32)                                                                                  | 7 (37)               |
| 65-74                            | 68 (45)                                                                                  | 10 (53)              |
| 75 and older                     | 34 (23)                                                                                  | 1 (5)                |
| <b>Education</b>                 |                                                                                          |                      |
| No High School Diploma           | 19 (13)                                                                                  | 0 (0)                |
| High School Diploma              | 40 (27)                                                                                  | 2 (27)               |
| Some college/graduate            | 91 (60)                                                                                  | 17 (73)              |

207           The implementation process was evaluated through a combination of informal interviews  
208 with FBO leadership, CHAs and participant survey items. Based on CFIR reporting guidelines,  
209 the findings highlighted the intervention characteristics (five constructs), inner setting (three  
210 constructs, three subconstructs), and the process (three constructs, two sub-constructs) as the  
211 most frequently addressed components of the CFIR, while individual characteristics (one  
212 construct) received comparatively less attention in the data. This is likely due to the

213 intervention's focus on the FBOs and the CHAs collectively rather than individually. The  
214 influential components of the CFIR that emerged from the data are illustrated in Fig 2.

## 215 **Fig 2. Adapted Consolidated Framework**

216

### 217 **CFIR-related intervention characteristics**

#### 218 **a) Evidence strength**

219 The project utilized a CBPR approach, considered a high-quality study design in the field of  
220 public health research (18). The project's use of faith-based health advisors aligns with evidence  
221 supporting this approach's effectiveness in closing unmet needs gaps and decreasing health  
222 disparities for minority communities, including AAs (11, 12, 19-23). The CDC "scaling up  
223 operation" recommends that faith-based organizations (FBOs) establish and maintain  
224 communication with local authorities and work closely with health organizations to implement  
225 COVID-19 guidelines Field [22] effectively. Telehealth methods had been suggested as an  
226 innovative approach to delivering healthcare services to vulnerable populations, such as AAs,  
227 who experience disparities in accessing and maintaining healthcare services (24-26). AA  
228 churches have historically supported their families economically, spiritually, socially, and  
229 culturally through programs that are unmatched by other social institutions (11).

#### 230 **b) Relative advantage**

231 CHAs reported various advantages of telehealth technology, including improved access to  
232 primary care provider, reduced barriers to support, and more frequent communication with  
233 participants. This allowed for personalized and timely assistance, reduced in-person visits during  
234 the pandemic, and provided greater flexibility in scheduling provider appointments.

### 235 **c) Adaptability**

236 The COVID-19 pandemic greatly impacted chronic disease management for underserved older  
237 adults, with social distancing limiting in-person visits. Telehealth was initially used but faced  
238 technological barriers and rapport challenges. The project team adapted with a hybrid model,  
239 combining in-person and telehealth check-ins, allowing for personalized care and improved  
240 communication.

### 241 **d) Design quality and packaging**

242 The research project ensured design quality by providing comprehensive training to FBO leaders  
243 and CHAs through a 3-day virtual workshop. FBO leaders received computers, while CHAs  
244 were given iPads, resource manuals, and biweekly discussion topics with detailed links to data  
245 and resource materials. Continuous feedback and response mechanisms were implemented  
246 through weekly meetings with research staff.

### 247 **e) Complexity**

248 The project involved bi-weekly meetings for nine months, with maintaining regular  
249 communication between CHAs and older adults. Pre- and post-intervention surveys focused on  
250 nutrition, physical activity, food insecurity and a health tracking assessment was utilized to  
251 measure progress. A hybrid model of videoconferencing, phone calls, and in-person sessions  
252 provided flexibility, but also required reliable internet and access to technology. The team  
253 addressed these challenges by offering technical support and troubleshooting.

### 254 **CFIR-related inner settings**

255 The research team implemented a comprehensive communication plan promoting regular  
256 stakeholder engagement, including virtual weekly check-ins between research staff and CHAs.  
257 The approach enabled collaboration and innovation by fostering strong relationships between

258 CHAs and the older adults they served and facilitating peer-support groups and team-building  
259 activities among CHAs, which proved crucial during the COVID-19 pandemic.

260 **a) Culture**

261 The use of CHAs from the churches also ensured that the project was culturally appropriate and  
262 responsive to the community's needs. Several specific examples of the culture construct can be  
263 highlighted to demonstrate how it was addressed and integrated throughout this project's  
264 implementation process. Some included:

265 Cultural beliefs about health and illness - The project addressed community preferences  
266 for traditional or alternative medicine by training CHAs to integrate these beliefs into  
267 evidence-based self-management strategies.

268 *"As a CHA, I encountered an older adult who relied on herbal remedies to manage their*  
269 *diabetes. I worked with them to ensure these remedies were used alongside conventional*  
270 *treatments, resulting in better blood sugar control."* (FBO#1,CHA#2)

271 Dietary practices and preferences - The research team ensured that culturally relevant  
272 nutritional advice was provided, considering specific dietary practices and preferences  
273 within the AA community.

274 *"One of my older adults loved soul food, so I helped them find ways to prepare their*  
275 *favorite dishes using healthier ingredients and cooking methods, making their meals both*  
276 *culturally satisfying and beneficial to their health."* (FBO#2,CHA#1)

277 Language and communication - CHAs were recruited for their familiarity with the  
278 cultural context and communication styles of AA older adults, and educational materials  
279 were adapted to be culturally appropriate.

280 *"We made sure our educational materials spoke to our community, using analogies and*  
281 *references that our older adults could easily relate to. This approach made complex*  
282 *health concepts more accessible and understandable." (FBO#4,CHA#2)*

283 Family and community dynamics - CHAs were encouraged to engage with the older  
284 adults, their families, and community networks, fostering a supportive environment for  
285 self-management strategies.

286 *'Most of the people I recruited were my family – my husband and sisters. Going through*  
287 *this process, I was able to find out about everyone's health issues that I never knew they*  
288 *dealt with in the past.'* (FBO#1,CHA#1)

289 Traditional community gatherings - The research team used traditional AA community  
290 gatherings as opportunities to raise awareness about the health ambassador program and  
291 engage with the community, demonstrating respect for the community's culture and  
292 building trust with older adults and their families.

293 *"I used our weekly dinner and bingo sessions to talk with community members about the*  
294 *health ambassador program. We shared stories, addressed concerns, and offered support*  
295 *in a relaxed, familiar environment. It helped us build trust and connect with the*  
296 *community on a deeper level." (FBO#5,CHA#3)*

297

## 298 **b) Implementation climate**

299 The implementation climate for the CHA intervention required a sense of shared commitment,  
300 necessary resources, training, and clear goals. Issues related to clarity posed challenges,  
301 including confusion about objectives, roles, and expected outcomes. To address these issues, the  
302 research team organized additional meetings and workshops, developed detailed guidelines,



303 established more explicit performance metrics, and implemented regular check-ins with CHAs  
304 and community partners. These efforts helped maintain clarity, resolve emerging issues, and  
305 reinforce the shared commitment to the program's goals.

306 Tension for change: This awareness of existing health disparities within our target  
307 communities created a sense of urgency and motivation for change among the research  
308 team, CHAs, and community partners, fostering a conducive environment for  
309 implementing the CHA intervention. The lack of support felt by AA older adults,  
310 heightened concern, misinformation, disinformation, confusion messaging and awareness  
311 of the risks associated with the pandemic increased this tension for change as  
312 stakeholders recognized the need for additional support and resources.

313 As the CHA intervention was implemented, the research team gathered success stories  
314 from older adults who had benefitted from the support provided by the CHAs. Sharing  
315 these success stories with the broader community, including those who were initially  
316 resistant to the program, helped demonstrate the intervention's positive impact and  
317 increased the tension for change by showcasing the program's benefits.

318 Compatibility: To address the specific needs of each participant, the project permitted  
319 CHAs to customize the delivery of interventions based on the choices and circumstances  
320 of each older adult (*Kangovi et al., 2014*). Depending on the participant's comfort level  
321 and accessibility, CHAs selected in-person visits, phone conversations, or virtual  
322 meetings. Its adaptability boosted the program's compatibility with the various demands  
323 of the older adults and aided in sustaining participation throughout the intervention.

324 Relative Priority: Non-participating local church leaders and FBOs collaborated with the  
325 project team, referring older adults needing CHA support and actively participating in  
326 evaluating and improving the intervention.

## 327 **CFIR-related individual characteristics**

### 328 **Self-efficacy**

329 The project equipped CHAs with the knowledge, skills, and resources to provide tailored  
330 support, broadly classifying the approach under training, social support, and peer modeling.

331 Training: CHAs were trained to employ goal-setting, problem-solving, and self-  
332 monitoring approaches to assist older persons in gaining confidence in their abilities to  
333 manage chronic diseases and stick to treatment programs.

334 Peer Modeling: The CHAs, who shared comparable cultural and socioeconomic  
335 backgrounds with the older persons they supported, functioned as role models by  
336 displaying good self-management skills and highlighting success stories from their  
337 communities. Peer modeling played a crucial impact in boosting older individuals' self-  
338 efficacy.

339 CHAs offered personal experiences or stories of community members who effectively  
340 treated their chronic health conditions, demonstrating the viability of adopting healthy  
341 practices and highlighting the advantages of active self-management.

342 Social Support: The CHAs also gave older persons with social support, boosting their  
343 self-efficacy by establishing a sense of belonging and connection. This assistance  
344 comprised emotional encouragement, educational support, and practical solutions in  
345 managing their chronic diseases. CHAs provided reassurance, answered concerns, and  
346 assisted with chores such as organizing medical visits and navigating the healthcare  
347 system.

## 348 **CFIR-related process**

### 349 **a) Planning**

350 The project team began by clearly outlining the objectives and goals of the intervention, such as  
 351 improving chronic disease management among participants and increasing their engagement in  
 352 health-promoting behaviors. Next, the team conducted a thorough assessment of the available  
 353 resources, including human and technological resources, to support the implementation of the  
 354 intervention. For instance, we identified local health professionals within the churches who could  
 355 serve as CHAs and ensured access to necessary technological tools. After assessing the  
 356 resources, the project team developed a detailed timeline for the implementation of the  
 357 intervention, which included milestones and deadlines for each phase of the project (Table 4).  
 358 Lastly, recognizing that unforeseen challenges might arise during the implementation of the  
 359 intervention, particularly given the uncertainty of the COVID-19 pandemic, the project team  
 360 developed contingency plans to address potential barriers. For instance, we prepared alternative  
 361 training methods and modes of communication to accommodate potential lockdowns or changes  
 362 in public health guidelines.

Table 4. Project Timeline

| Activity                                            | Months |     |     |        |       |       |
|-----------------------------------------------------|--------|-----|-----|--------|-------|-------|
|                                                     | 1-3    | 4-6 | 7-9 | 10- 14 | 15-19 | 20-24 |
| Recruitment of FBOs                                 | x      |     |     |        |       |       |
| FBO curriculum development and workshops            | x      |     |     |        |       |       |
| Recruitment and training of FBO lay health advisors | x      | x   |     |        |       |       |
| Recruitment of participants                         |        | x   | x   |        |       |       |

|                                                         |  |  |   |   |   |   |
|---------------------------------------------------------|--|--|---|---|---|---|
| Collection of baseline data from participants           |  |  | X |   |   |   |
| Implementation of CHAP                                  |  |  |   | X | X |   |
| Collection of post-CHAP data from participants and CHAs |  |  |   |   |   | X |

363

364 **b) Engaging**

365 Ten out of the seventeen FBOs representing the study’s first cohort with their respective  
 366 leaders actively partook in the study. Each participating FBO leader was sent an invitation notice  
 367 via email, which contained information regarding the study. Once an expression of interest to  
 368 participate was received, the research team met with these leaders to deliberate the expectations  
 369 and research plan. FBO leaders were crucial in recruiting potential volunteers as CHAs based on  
 370 their experience, interest, and ability to work with older adults in their congregation. FBOs held  
 371 virtual meetings to discuss the project's goals and objectives with interested volunteers and  
 372 provided them with details of the eligibility criteria. They also used various communication  
 373 channels such as bulletins, newsletters, and announcements during the few in-person services to  
 374 spread the word about volunteer opportunities.

375 Opinion leaders (Formally appointed implementation leaders): As internal  
 376 implementation leaders, FBO leaders faced competing priorities and interests, making it  
 377 challenging to consistently support the project. The research team implemented strategies  
 378 such as flexible scheduling, frequent communication, and progress updates to address  
 379 this. The research team maintained their support and involvement by accommodating the  
 380 FBO leaders' busy schedules.

381 Champions: CHAs faced challenges balancing responsibilities and staying up-to-date  
382 with relevant information. The research team supported CHAs through refresher training,  
383 providing iPads, offering recognition, weekly check-ins, and maintaining constant  
384 communication. By addressing these challenges and offering flexible scheduling, the  
385 team created an environment for CHAs to thrive.

### 386 **c) Executing**

387 To enhance CHA recruitment efforts by leaders of various FBOs, the research team  
388 employed a combination of strategies and procedures to ensure we attracted and retained  
389 dedicated, competent and diverse group of individuals. These strategies and procedures included:

390 External Collaborations: The research team partnered with local community  
391 organizations, such as African American Community Empowerment Council (AACEC),  
392 to identify potential CHAs within their target population. This approach facilitated the  
393 recruitment of individuals who were already active in their communities and had  
394 established connections with the older adults they would support.

395 Word-of-mouth referrals: The research team encouraged existing CHAs and other  
396 community members involved in the project to refer potential candidates from their  
397 personal and professional networks. This strategy helped identify individuals who were  
398 passionate about helping others and had the interpersonal skills necessary to succeed as a  
399 CHA.

400 Social Media: The research team utilized various advertising channels, such as our FBOs'  
401 social media platforms and radio announcements, to reach a wider audience and inform  
402 them about the opportunity to become a CHA. This strategy increased the visibility of the  
403 project and attracted a diverse pool of candidates.

## 404 **Discussion**

405 Our findings from 17 AA churches in South Los Angeles revealed a high project completion rate  
406 (72%) among participants. This success can be attributed to the implementation of a culturally  
407 sensitive, contextually relevant, and responsive approach achieved through CBPR. This  
408 approach, which involved partnering with community churches, likely increased participants'  
409 trust and engagement with the intervention. (18, 27, 28). These findings align with existing  
410 literature on community-based health interventions targeting underserved populations. A study  
411 by Kangovi and colleagues (2014) implemented a community health worker intervention in a  
412 low-income urban population and observed significant improvements in chronic disease control  
413 and mental health outcomes (29). Similarly, Resnicow and colleagues (2006) found that a  
414 culturally tailored intervention was more effective in achieving behavior change among AA  
415 adults attempting to increase fruit and vegetable consumption (30).

416 We also observed a considerably higher (70%) number of female participants in this  
417 study. In comparison, Kangovi and colleagues (2014) also observed a larger number of female  
418 participants (69%) (29). Women, particularly in AA communities, often play a vital role in the  
419 social and spiritual life of their communities, with churches traditionally serving as the focal  
420 point (7). Additionally, women tend to be more health-conscious and are more likely than men to  
421 participate in preventive health initiatives(31). They are also more inclined to seek medical care,  
422 adhere to medical advice, and engage in health-promoting behaviors (32). CHAP's focus on  
423 underserved AA older adults with chronic health conditions is consistent with other research  
424 highlighting the need for targeted interventions in this population (33, 34). For instance, Lorig  
425 and colleagues (2001) found that a self-management program targeting self-efficacy in patients  
426 with chronic diseases improved health status, self-management behaviors, and healthcare  
427 utilization (33).

428           This study also highlights the effectiveness of a hybrid approach combining telehealth  
429 and in-person visits. Telehealth technology improved access to care, reduced barriers, and  
430 offered increased flexibility in scheduling provider appointments, but faced challenges such as  
431 technological barriers and maintaining rapport between CHAs and participants (15, 35).  
432 Adapting to the hybrid model provided personalized care and improved communication while  
433 addressing the limitations of CHAP's initial approach (36). This approach aligns with findings  
434 from several studies that have examined the benefits of hybrid interaction models in various  
435 populations and contexts. These studies have found that a hybrid telehealth model improved  
436 patient satisfaction, access to care, and health outcomes among older adults with multiple  
437 chronic health conditions(37-40). Similarly, Hollander & Carr (2020) reported that telehealth and  
438 in-person visits enhanced patient engagement and facilitated timely care, particularly during the  
439 pandemic when access to healthcare was limited (36). In another study, Greenhalgh and  
440 colleagues (2020) emphasized the importance of adaptability and a hybrid approach to ensure  
441 personalized, flexible patient care strategies during the pandemic (41). Furthermore, Smith and  
442 colleagues (2020) highlighted the benefits of telehealth in expanding access to healthcare and  
443 mitigating barriers faced by underserved populations, including older AA adults (15).

444           Clear communication and robust relationships were vital for the project's success, as  
445 CHAs offered tailored support to older adults (15, 35). The project's cultural sensitivity enhanced  
446 its acceptability among the AA older adult population. A supportive environment for  
447 implementation was crucial, with effective communication addressing health disparities and risks  
448 associated with the pandemic such as misinformation and vaccine hesitancy (36, 41). Tailoring  
449 the intervention delivery ensured compatibility and maintained participant engagement  
450 throughout the intervention (29). The current project's cooperation with local church leaders and  
451 FBOs aligns with Smith and colleagues (2014) (2020), who also found that engaging FBOs was

452 crucial in recruiting community health advisors and ensuring the success of their intervention  
453 (15). This collaboration reinforces the significance of community engagement and partnership in  
454 promoting the reach and impact of health initiatives.

## 455 **Limitations**

456 The project took place during the height of the COVID-19 pandemic, which presented unique  
457 challenges to managing chronic health conditions for African American older adults, particularly  
458 those who were isolated or had limited access to healthcare. Due to the small sample size,  
459 statistical comparisons were not feasible.

## 460 **Conclusions**

461 Overall, the findings from this study offer significant insights into the implementation process  
462 and highlight essential factors to be considered when designing interventions for similar  
463 contexts. These insights contribute valuable knowledge about the feasibility, acceptability, and  
464 impact of a hybrid (virtual/in-person) lay health advisor model during the pandemic. They can  
465 guide the development of future interventions in this domain. Our results are also consistent with  
466 existing research on the effectiveness of community-based health interventions for underserved  
467 populations. The high completion rate and improvements in chronic health condition  
468 management underscore the necessity of incorporating culturally sensitive, contextually relevant,  
469 and responsive strategies in healthcare interventions aimed at underserved African American  
470 older adults.

## 471 **Acknowledgements**

472 We would like to extend our sincere appreciation to the following faith-based organizations, all  
473 located in South Los Angeles, CA, and their respective leaders for their valuable partnership and



474 support in the completion of this community-centered research project: Beulah Baptist Church  
475 (Rev. Dr. Robert L Taylor) Holy Mt. Calvary Missionary Baptist Church (Dr. Leonard White),  
476 Mount Salem Missionary Baptist Church (Pastor Patricia Joyce Strong-Fargas), Shiloh  
477 Missionary Baptist Church (Dr. Joe Waller), St. Mark Missionary Baptist Church (Dr. Lovely  
478 Haynes), and FAME Church (Reverend Judi Wortham). Burning Bush Church (First Lady Lorrie  
479 Denson) is in Inland Empire, CA.

## 480 **Author Contributions**

481 M.B., S.C. and R.V. were involved in the conception, funding acquisition, and design of the  
482 study. M.B., S.B., and E.K.A. performed the data analysis and interpretation. E.K.A., H.S, J.W.,  
483 and M.B. together drafted the initial manuscript. In addition, E.K.A., H.S., J.W., M.B. and  
484 L.W.K. were involved in overseeing the study and data collection. All authors have read and  
485 agreed to the published version of the manuscript.

## 486 **REFERENCES**

- 487 1. Millett GA, Jones AT, Benkeser D, Baral S, Mercer L, Beyrer C, et al. Assessing  
488 differential impacts of COVID-19 on black communities. *Ann Epidemiol.* 2020;47:37-44.
- 489 2. Chowkwanyun M, Reed AL, Jr. Racial Health Disparities and Covid-19 - Caution and  
490 Context. *N Engl J Med.* 2020;383(3):201-3.
- 491 3. Webb Hooper M, Nápoles AM, Pérez-Stable EJ. COVID-19 and Racial/Ethnic Disparities.  
492 *JAMA.* 2020;323(24):2466-7.
- 493 4. Fiscella K, Franks P, Gold MR, Clancy CM. Inequality in quality: addressing  
494 socioeconomic, racial, and ethnic disparities in health care. *Jama.* 2000;283(19):2579-84.
- 495 5. Alcendor DJ. Racial Disparities-Associated COVID-19 Mortality among Minority  
496 Populations in the US. *J Clin Med.* 2020;9(8).
- 497 6. Zarocostas J. How to fight an infodemic. *Lancet.* 2020;395(10225):676.
- 498 7. Chatters LM, Taylor RJ, Bullard KM, Jackson JS. Race and Ethnic Differences in  
499 Religious Involvement: African Americans, Caribbean Blacks and Non-Hispanic Whites. *Ethn*  
500 *Racial Stud.* 2009;32(7):1143-63.
- 501 8. Gaskin DJ, Dinwiddie GY, Chan KS, McCleary R. Residential segregation and disparities  
502 in health care services utilization. *Med Care Res Rev.* 2012;69(2):158-75.
- 503 9. Brownstein JN, Chowdhury FM, Norris SL, Horsley T, Jack L, Jr., Zhang X, et al.  
504 Effectiveness of community health workers in the care of people with hypertension. *Am J Prev*  
505 *Med.* 2007;32(5):435-47.
- 506 10. Swider SM. Outcome Effectiveness of Community Health Workers: An Integrative  
507 Literature Review. *Public Health Nursing.* 2002;19(1):11-20.
- 508 11. Campbell MK, Hudson MA, Resnicow K, Blakeney N, Paxton A, Baskin M. Church-based  
509 health promotion interventions: evidence and lessons learned. *Annu Rev Public Health.*  
510 2007;28:213-34.

- 511 12. DeHaven MJ, Hunter IB, Wilder L, Walton JW, Berry J. Health programs in faith-based  
512 organizations: are they effective? *Am J Public Health*. 2004;94(6):1030-6.
- 513 13. Spencer MS, Rosland AM, Kieffer EC, Sinco BR, Valerio M, Palmisano G, et al.  
514 Effectiveness of a community health worker intervention among African American and Latino  
515 adults with type 2 diabetes: a randomized controlled trial. *Am J Public Health*. 2011;101(12):2253-  
516 60.
- 517 14. Gordon NP, Hornbrook MC. Older adults' readiness to engage with eHealth patient  
518 education and self-care resources: a cross-sectional survey. *BMC Health Serv Res*.  
519 2018;18(1):220.
- 520 15. Smith AC, Thomas E, Snoswell CL, Haydon H, Mehrotra A, Clemensen J, et al. Telehealth  
521 for global emergencies: Implications for coronavirus disease 2019 (COVID-19). *J Telemed*  
522 *Telecare*. 2020;26(5):309-13.
- 523 16. Los Angeles County Department of Health - Office of Health Assessment and  
524 Epidemiology. Key Indicators by Services Planning Area 2017 (Accessed 1-10-2023). Available  
525 from:  
526 [http://publichealth.lacounty.gov/ha/docs/2015LACHS/KeyIndicator/Correction/KIH\\_020617-](http://publichealth.lacounty.gov/ha/docs/2015LACHS/KeyIndicator/Correction/KIH_020617-sec.pdf)  
527 [sec.pdf](http://publichealth.lacounty.gov/ha/docs/2015LACHS/KeyIndicator/Correction/KIH_020617-sec.pdf)
- 528 17. Damschroder LJ, Aron DC, Keith RE, Kirsh SR, Alexander JA, Lowery JC. Fostering  
529 implementation of health services research findings into practice: a consolidated framework for  
530 advancing implementation science. *Implementation Science*. 2009;4(1):50.
- 531 18. Israel BA, Parker EA, Rowe Z, Salvatore A, Minkler M, López J, et al. Community-based  
532 participatory research: lessons learned from the Centers for Children's Environmental Health and  
533 Disease Prevention Research. *Environ Health Perspect*. 2005;113(10):1463-71.

- 534 19. Tussing-Humphreys L, Thomson JL, Mayo T, Edmond E. A church-based diet and  
535 physical activity intervention for rural, lower Mississippi Delta African American adults: Delta  
536 Body and Soul effectiveness study, 2010-2011. *Prev Chronic Dis.* 2013;10:E92.
- 537 20. Lancaster KJ, Carter-Edwards L, Grilo S, Shen C, Schoenthaler AM. Obesity interventions  
538 in African American faith-based organizations: a systematic review. *Obes Rev.* 2014;15 Suppl  
539 4:159-76.
- 540 21. Kegler MC, Escoffery C, Alcantara I, Ballard D, Glanz K. A qualitative examination of  
541 home and neighborhood environments for obesity prevention in rural adults. *Int J Behav Nutr Phys*  
542 *Act.* 2008;5:65.
- 543 22. Bopp M, Fallon EA. Health and wellness programming in faith-based organizations: a  
544 description of a nationwide sample. *Health Promot Pract.* 2013;14(1):122-31.
- 545 23. Samuel-Hodge CD, Keyserling TC, France R, Ingram AF, Johnston LF, Pullen Davis L, et  
546 al. A church-based diabetes self-management education program for African Americans with type  
547 2 diabetes. *Prev Chronic Dis.* 2006;3(3):A93.
- 548 24. Joseph RP, Pekmezi D, Dutton GR, Cherrington AL, Kim YI, Allison JJ, et al. Results of  
549 a Culturally Adapted Internet-Enhanced Physical Activity Pilot Intervention for Overweight and  
550 Obese Young Adult African American Women. *J Transcult Nurs.* 2016;27(2):136-46.
- 551 25. Brooks E, Manson SM, Bair B, Dailey N, Shore JH. The diffusion of telehealth in rural  
552 American Indian communities: a retrospective survey of key stakeholders. *Telemed J E Health.*  
553 2012;18(1):60-6.
- 554 26. Ekwegh T, Cobb S, Adinkrah EK, Vargas R, Kibe LW, Sanchez H, et al. Factors  
555 Associated with Telehealth Utilization among Older African Americans in South Los Angeles  
556 during the COVID-19 Pandemic. *International Journal of Environmental Research and Public*  
557 *Health.* 2023;20(3):2675.

- 558 27. Minkler M, Blackwell AG, Thompson M, Tamir H. Community-based participatory  
559 research: implications for public health funding. *Am J Public Health*. 2003;93(8):1210-3.
- 560 28. Wallerstein N. DB, Oetzel J., Minkler M. Community-based participatory research for  
561 health : advancing social and health equity  
562 . Third ed. San Francisco, CA,: Jossey-Bass, a Wiley Brand 2017 October, 2017.
- 563 29. Kangovi S, Mitra N, Grande D, White ML, McCollum S, Sellman J, et al. Patient-centered  
564 community health worker intervention to improve posthospital outcomes: a randomized clinical  
565 trial. *JAMA Intern Med*. 2014;174(4):535-43.
- 566 30. Resnicow K, Davis R, Rollnick S. Motivational interviewing for pediatric obesity:  
567 Conceptual issues and evidence review. *J Am Diet Assoc*. 2006;106(12):2024-33.
- 568 31. Verbrugge LM. Gender and Health: An Update on Hypotheses and Evidence. *Journal of*  
569 *Health and Social Behavior*. 1985;26(3):156-82.
- 570 32. Redondo-Sendino A, Guallar-Castillón P, Banegas JR, Rodríguez-Artalejo F. Gender  
571 differences in the utilization of health-care services among the older adult population of Spain.  
572 *BMC Public Health*. 2006;6:155.
- 573 33. Lorig KR, Sobel DS, Ritter PL, Laurent D, Hobbs M. Effect of a self-management program  
574 on patients with chronic disease. *Eff Clin Pract*. 2001;4(6):256-62.
- 575 34. Fiore MC, Hatsukami DK, Baker TB. Effective Tobacco Dependence Treatment. *JAMA*.  
576 2002;288(14):1768-71.
- 577 35. Parker S, Prince A, Thomas L, Song H, Milosevic D, Harris MF. Electronic, mobile and  
578 telehealth tools for vulnerable patients with chronic disease: a systematic review and realist  
579 synthesis. *BMJ Open*. 2018;8(8):e019192.
- 580 36. Hollander JE, Carr BG. Virtually Perfect? Telemedicine for Covid-19. *N Engl J Med*.  
581 2020;382(18):1679-81.

- 582 37. Toschi E, Adam A, Atakov-Castillo A, Slyne C, Laffel L, Munshi M. Use of Telemedicine  
583 in Adults with Type 1 Diabetes: Do Age and Use of Diabetes-Related Technology Matter?  
584 Telemed J E Health. 2023.
- 585 38. Jiang Y, Nuerdawulieti B, Chen Z, Guo J, Sun P, Chen M, et al. Effectiveness of patient  
586 decision aid supported shared decision-making intervention in in-person and virtual hybrid  
587 pulmonary rehabilitation in older adults with chronic obstructive pulmonary disease: A pilot  
588 randomized controlled trial. J Telemed Telecare. 2023:1357633X231156631.
- 589 39. Eiland L, Datta P, Samson K, Anzalone J, Donovan A, McAdam-Marx C. In-Person and  
590 Telehealth Provider Access and Glycemic Control for People With Diabetes During the COVID-  
591 19 Pandemic. J Diabetes Sci Technol. 2023:19322968231162866.
- 592 40. Colon-Semenza C, Zajac JA, Schwartz A, Darbandsari P, Ellis TD. Experiences from the  
593 implementation of physical therapy via telehealth for individuals with Parkinson disease during  
594 the COVID-19 pandemic. Disabil Rehabil. 2023:1-9.
- 595 41. Greenhalgh T, Wherton J, Shaw S, Morrison C. Video consultations for covid-19. Bmj.  
596 2020;368:m998.
- 597

Figure 1. Conceptual model of a hybrid community-partnered intervention project using faith based lay health advisors.

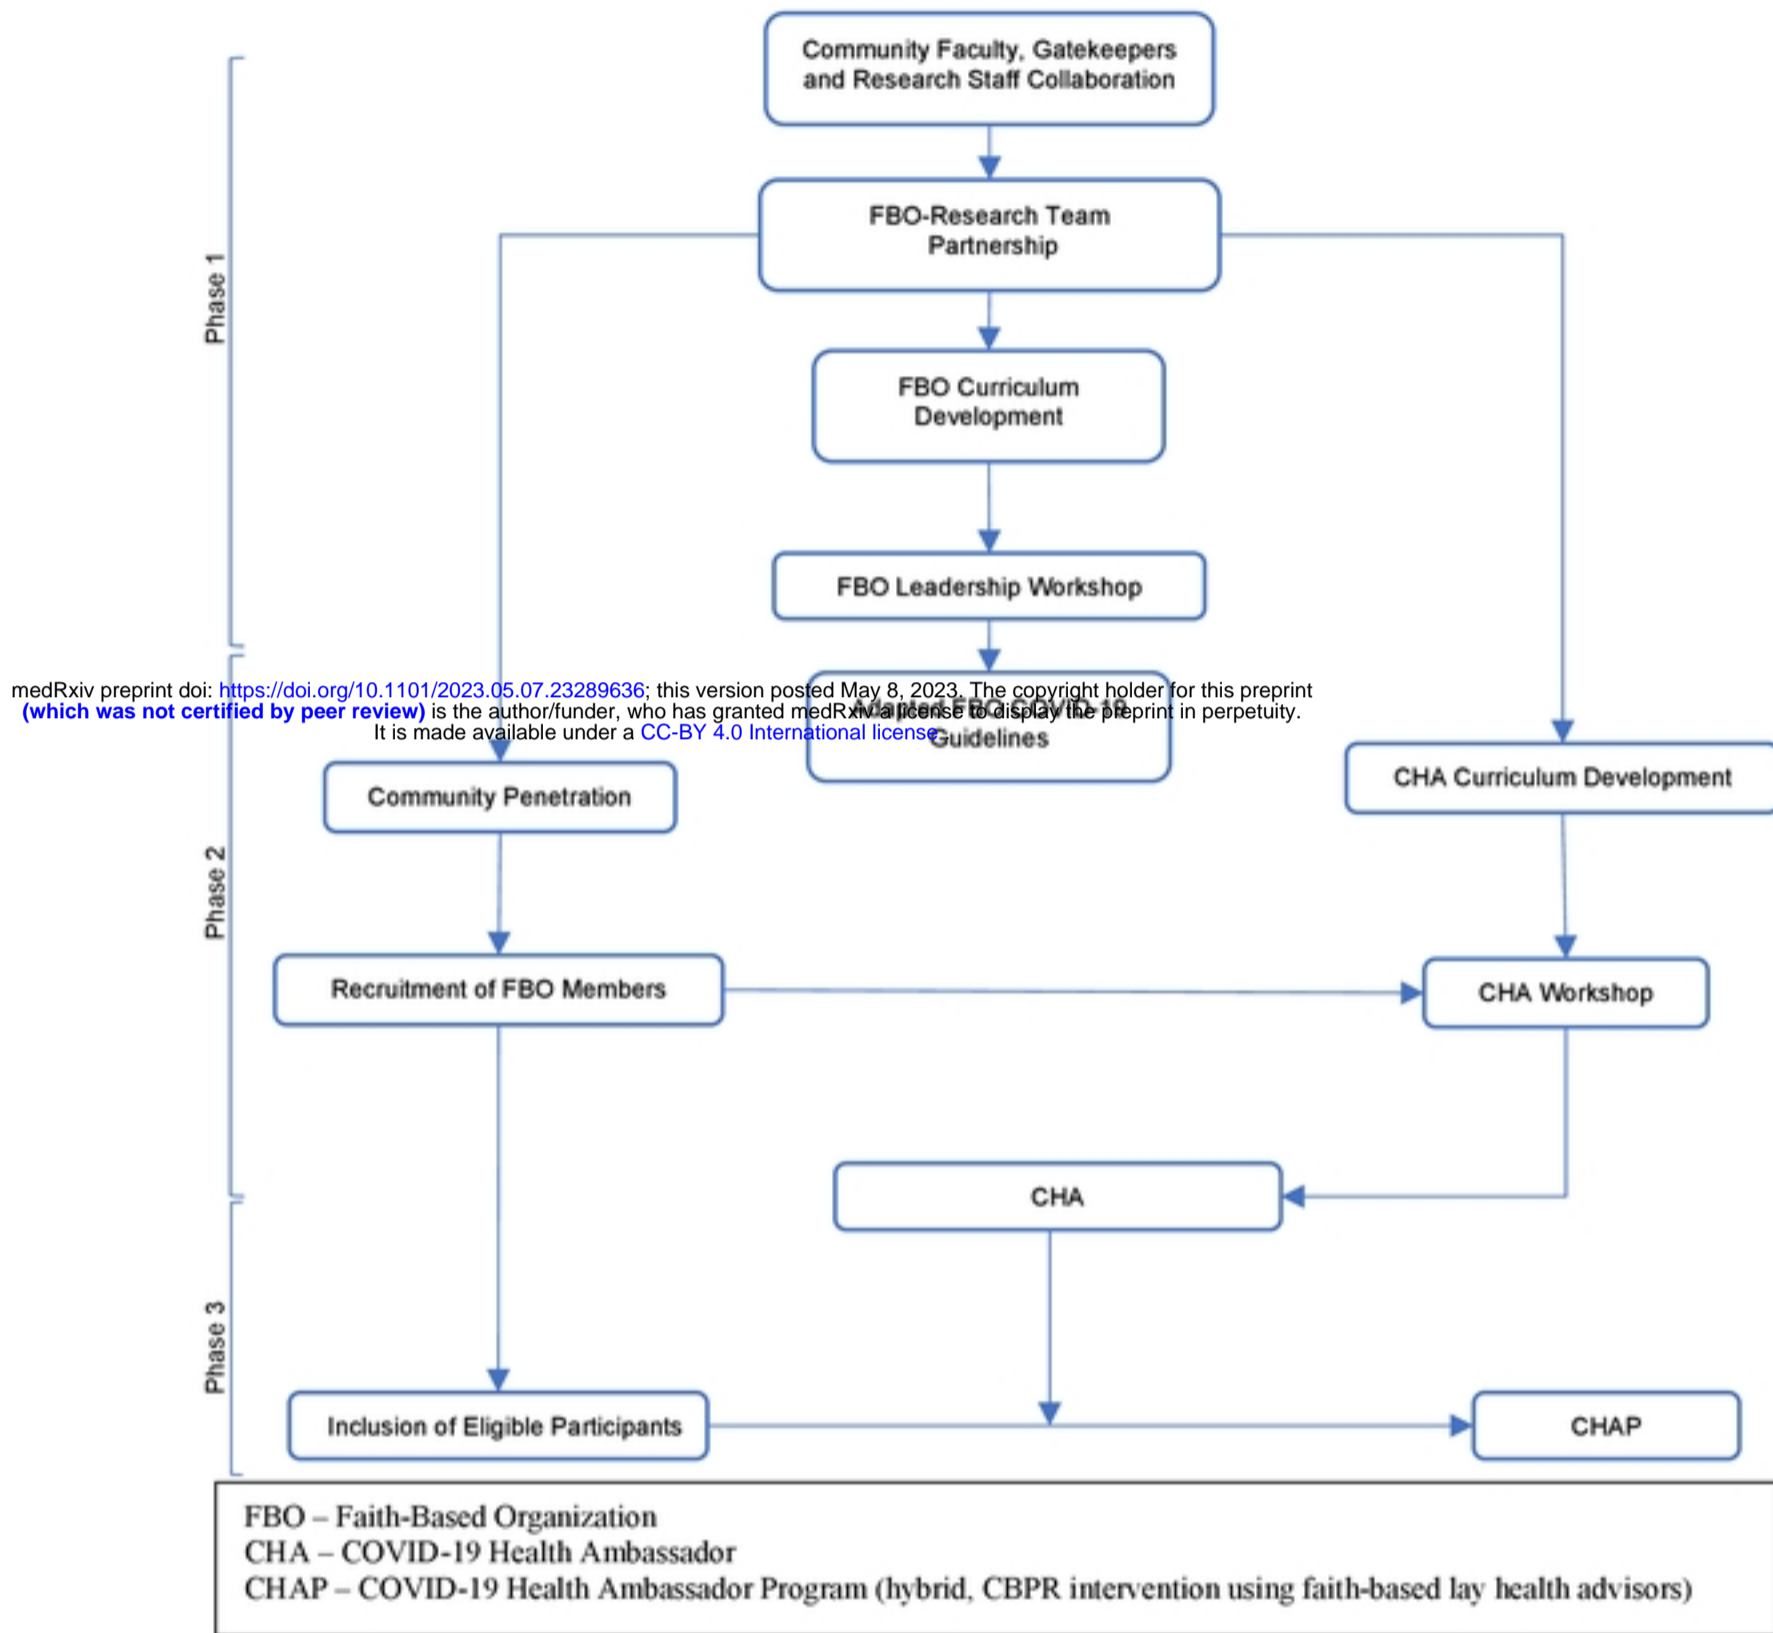

Figure 1

Figure 2. Adapted Consolidated Framework

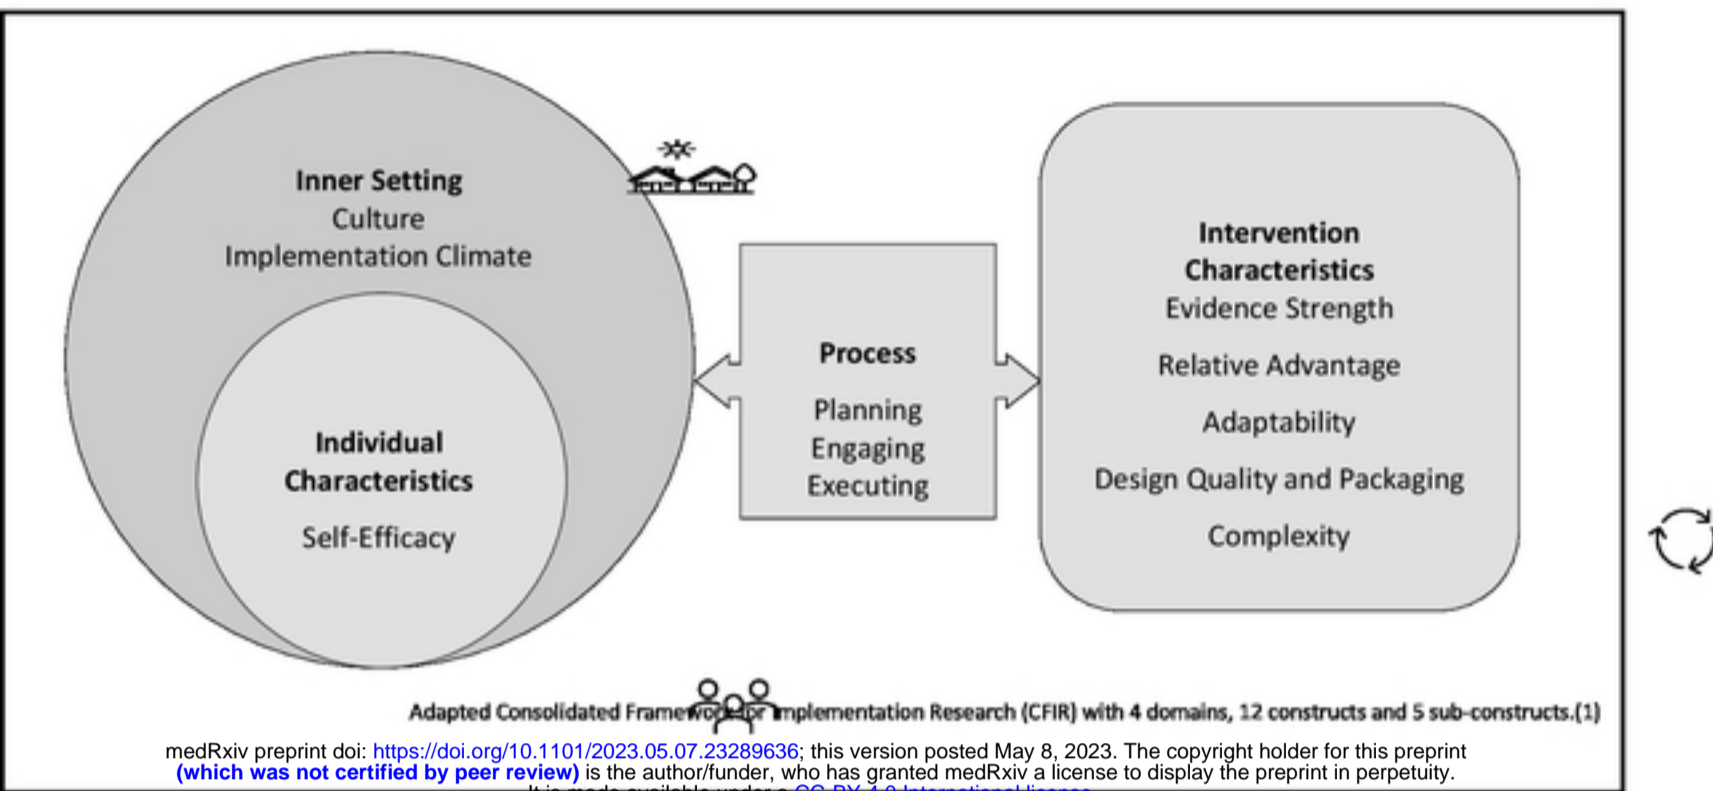

Source: https://medrxiv.org/content/10.1101/2023.05.07.23289636v1.full.pdf
